# Supplementary material for: DNA Methylation Profiles of Ovarian Epithelial Carcinoma Tumors and Cell Lines
Source: PubMed Central journal article supplement (PMC2825254; doi:10.1371/journal.pone.0009359), 2010-02-22

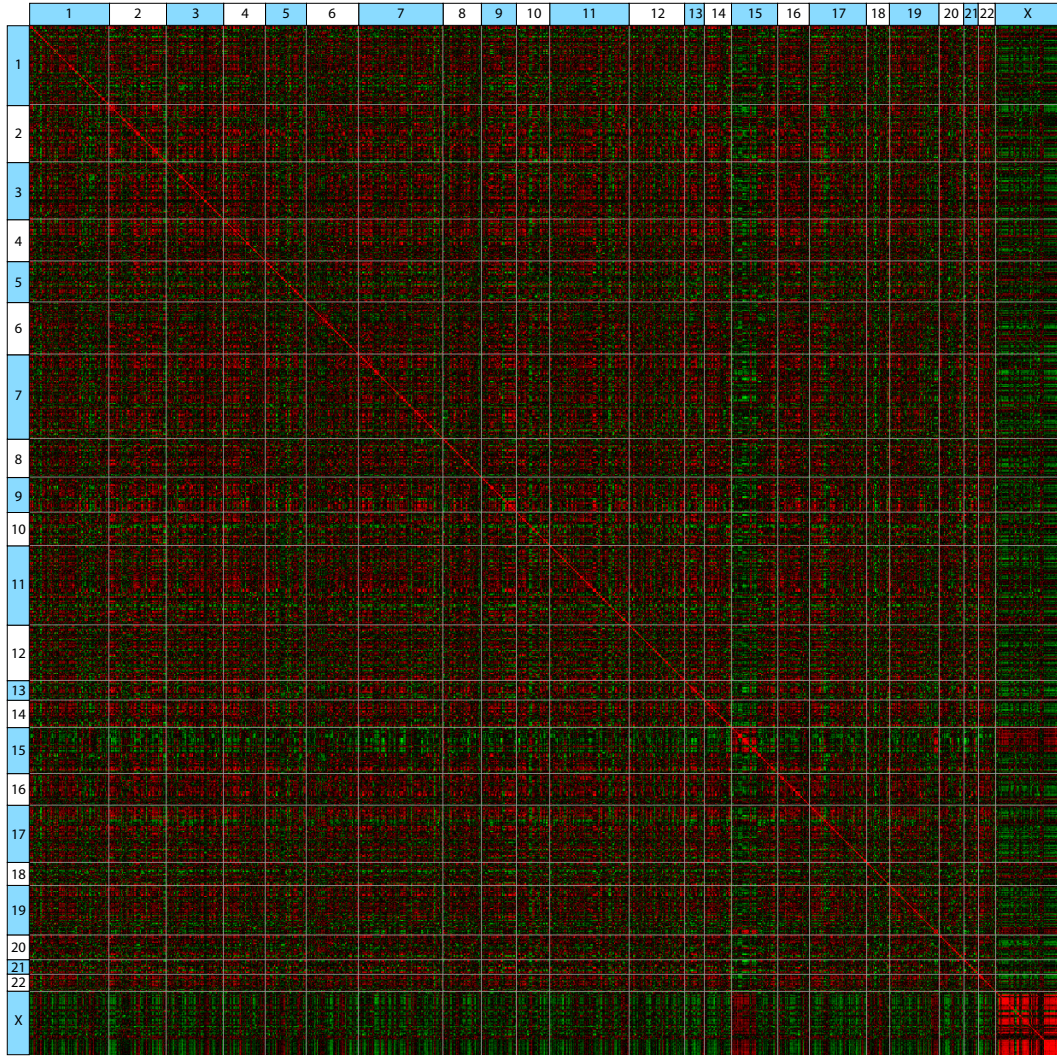

Supplement: pone.0009359.s005.pdf [file pone.0009359.s005.pdf]
